# Supplementary material for: Ionic liquids improve citronellyl ester synthesis catalyzed by immobilized Candida antarctica lipase B in solvent-free media
Source: Royal Society of Chemistry journal article supplement (doi:10.1039/b617444b), 2007-01-01

## Scanning electronic microscopy (SEM) images of Novozyme particles.

SEM pictures were obtained by using a JSM-6100 system at 15 kV and WD 11

Novozyme

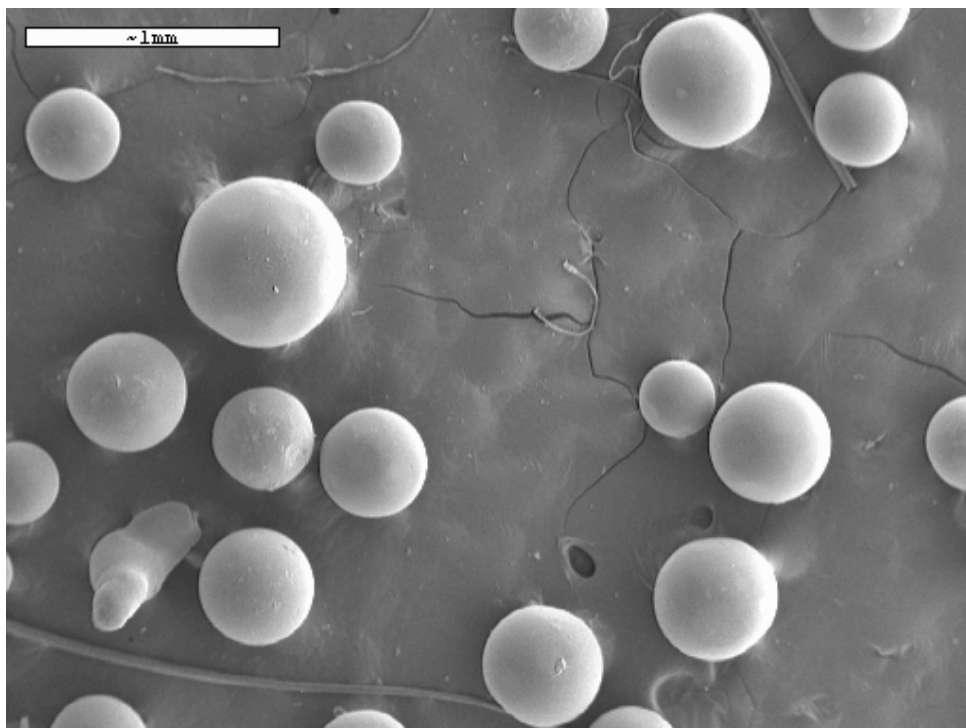

Novozyme coated  
with bmim PF<sub>6</sub>

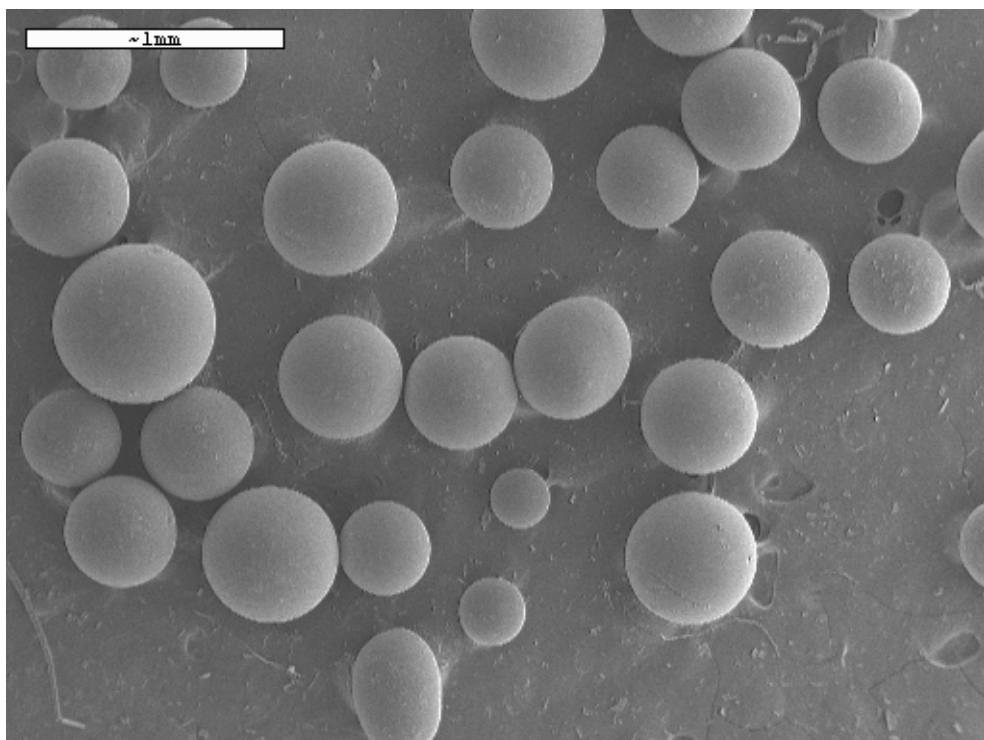

Novozyme coated  
with hmim PF<sub>6</sub>

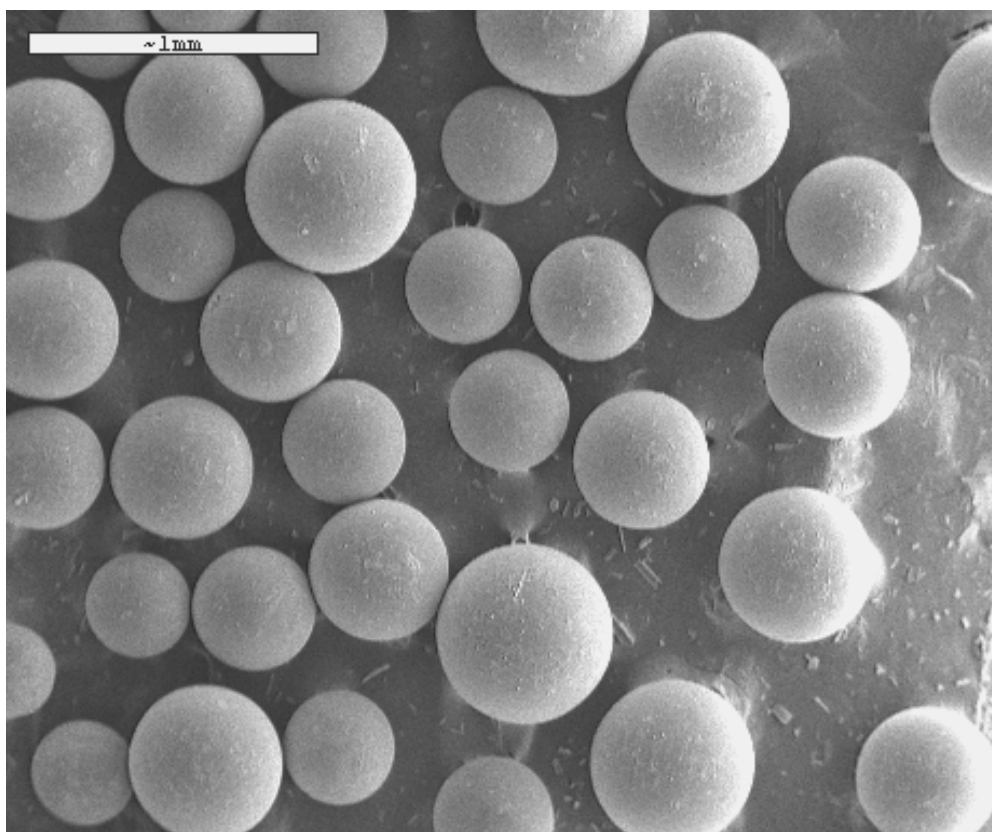

Novozyme coated  
with Omim PF<sub>6</sub>

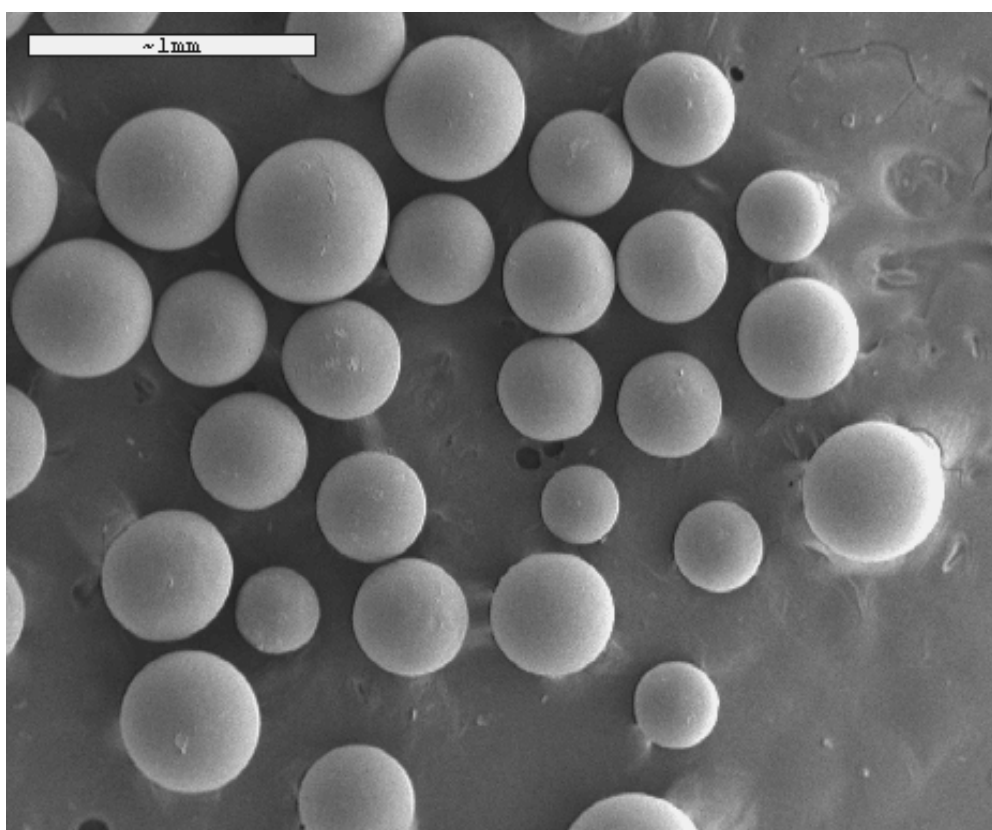

Supplement: b617444b.pdf [file b617444b.pdf]
